# Supplementary material
Source: MDPI journal article supplement (https://www.mdpi.com/2076-3417/12/21/11093)
Supplement: s1 [file s1]

**Table S4.** *Bacillus* spp. strains included in phylogenetic analysis of 16S rRNA gene sequences retrieved from NCBI database.

| Species and strain                                        | Accession no. of 16S<br>rRNA gene |
|-----------------------------------------------------------|-----------------------------------|
| Firmicutes phylum                                         |                                   |
| <i>Bacilli</i> class                                      |                                   |
| <i>Bacillaceae</i> family, <i>Bacillus</i> genus          |                                   |
| <i>Bacillus cereus</i> strain A                           | MK680808.1                        |
| <i>Bacillus cereus</i> strain PSB29                       | MH817419.1                        |
| <i>Bacillus paramycoides</i> strain SA27                  | MK467588.1                        |
| <i>Bacillus paramycoides</i> strain SA37                  | MK467558.1                        |
| <i>Bacillus pseudomycooides</i> strain 2018A0762NK02      | MT454159.1                        |
| <i>Bacillus pseudomycooides</i> strain B-60               | EU746686.1                        |
| <i>Bacillus pseudomycooides</i> strain GS8                | OL851767.1                        |
| <i>Bacillus</i> sp. (in: <i>Bacteria</i> ) strain FA1-161 | KY476138.1                        |
| <i>Bacillus subtilis</i> strain AGB1                      | OM273871.1                        |
| <i>Bacillus subtilis</i> strain B14                       | MZ976795.1                        |
| <i>Bacillus subtilis</i> strain CQ-Z7                     | MZ961353.1                        |
| <i>Bacillus thuringiensis</i> strain J8A1LARS             | MT378498.1                        |
| <i>Bacillus thuringiensis</i> strain Q1-S3                | JX994097.1                        |
| <i>Bacillus thuringiensis</i> strain Y4,                  | MW205819.1                        |
| Other <i>Bacillaceae</i> genera                           |                                   |
| <i>Oceanobacillus halophilus</i> strain J8B               | NR_109123.1                       |
