# Supplementary material
Source: MDPI journal article supplement (https://www.mdpi.com/2076-3417/12/21/11093)
Supplement: s1 [file s1]

**Table S1.** *Myroides* spp. strains included in phylogenetic analysis of 16S rRNA gene sequences retrieved from NCBI database.

| Species and strain                              | Accession no. of<br>16S rRNA gene |
|-------------------------------------------------|-----------------------------------|
| Bacteroidetes phylum                            |                                   |
| Flavobacteriia class                            |                                   |
| Flavobacteriaceae family, <i>Myroides</i> genus |                                   |
| <i>Myroides gitamensis</i> strain AV3           | KX436992.1                        |
| <i>Myroides gitamensis</i> strain BSH-3         | NR_125560.1                       |
| <i>Myroides guanonis</i> partial                | HE663456.1                        |
| <i>Myroides guanonis</i> strain IM13            | NR_108885.1                       |
| <i>Myroides indicus</i> strain UKS3             | NR_145659.1                       |
| <i>Myroides indicus</i> strain UKS3             | KC906253.2                        |
| <i>Myroides injenensis</i> strain M09-0166      | NR_134774.1                       |
| <i>Myroides injenensis</i> strain M09-0166      | HQ671078.1                        |
| <i>Myroides injenensis</i> strain M09-1053      | JX966100.1                        |
| <i>Myroides marinus</i> strain JS-08            | NR_117408.1                       |
| <i>Myroides marinus</i> strain RCB320           | KT260532.1                        |
| <i>Myroides marinus</i> strain WR7              | MN733112.1                        |
| <i>Myroides odoratimimus</i> strain Sample3     | MN378640.1                        |
| <i>Myroides odoratimimus</i> strain Sample4     | MN378641.1                        |
| <i>Myroides odoratimimus</i> strain Sample6     | MN378643.1                        |
| <i>Myroides odoratus</i> strain DSM 2801        | NR_112976.1                       |
| <i>Myroides odoratus</i> strain HAMBI1923       | LT899994.1                        |
| <i>Myroides odoratus</i> strain RCB317          | KT260529.1                        |
| <i>Myroides odoratus</i> strain SA17            | MZ430111.1                        |
| <i>Myroides pelagicus</i> strain NBRC 102469    | NR_114110.1                       |
| <i>Myroides pelagicus</i> strain SM1            | NR_041042.1                       |
| <i>Myroides phaeus</i> strain A6 S              | KU682196.1                        |
| <i>Myroides phaeus</i> strain MY15              | NR_117475.1                       |
| <i>Myroides profundus</i> isolate Y21           | KF730743.1                        |
| <i>Myroides profundus</i> strain D25            | NR_044435.1                       |
| Other Flavobacteriaceae genera                  |                                   |
| <i>Muriicola marianensis</i> strain A6B8        | KC839612.1                        |
