# Supplementary material
Source: MDPI journal article supplement (https://www.mdpi.com/2076-3417/12/21/11093)
Supplement: s1 [file s1]

**Table S3.** *Alcaligenes* spp. strains included in phylogenetic analysis of 16S rRNA gene sequences retrieved from NCBI database.

| Species and strain                                                    | Accession no. of 16S rRNA gene |
|-----------------------------------------------------------------------|--------------------------------|
| Proteobacteria phylum                                                 |                                |
| Betaproteobacteria class                                              |                                |
| Alcaligenaceae family, <i>Alcaligenes</i> genus                       |                                |
| <i>Alcaligenes aquatilis</i> strain C_11                              | KT748636.1                     |
| <i>Alcaligenes aquatilis</i> strain C_15                              | KT808884.1                     |
| <i>Alcaligenes aquatilis</i> strain C_6                               | KT748639.1                     |
| <i>Alcaligenes aquatilis</i> strain C_7                               | KT808882.1                     |
| <i>Alcaligenes endophyticus</i> strain AER10                          | KR967368.1                     |
| <i>Alcaligenes endophyticus</i> strain AER10                          | NR_156855.1                    |
| <i>Alcaligenes faecalis</i> strain 309-5                              | MG557817.1                     |
| <i>Alcaligenes faecalis</i> strain C_9                                | KT748643.1                     |
| <i>Alcaligenes faecalis</i> strain FC2960                             | MK517568.1                     |
| <i>Alcaligenes faecalis</i> strain FC2960                             | MK312671.1                     |
| <i>Alcaligenes faecalis</i> strain S-1                                | MN428656.1                     |
| <i>Alcaligenes faecalis</i> strain SH14                               | KC172021.1                     |
| <i>Alcaligenes faecalis</i> subsp. <i>phenolicus</i> strain DSM 16503 | OM074009.1                     |
| <i>Alcaligenes pakistanensis</i> 16S strain NCCP-650                  | AB920828.1                     |
| <i>Alcaligenes pakistanensis</i> 16S strain NCCP-667                  | AB968096.1                     |
| <i>Alcaligenes pakistanensis</i> strain Ap AB003                      | MZ048017.1                     |
| <i>Alcaligenes pakistanensis</i> strain NCCP-650                      | NR_145932.1                    |
| <i>Alcaligenes</i> sp. strain DGC1                                    | OM142496.1                     |
| Other Alcaligenaceae genera                                           |                                |
| <i>Castellaniella defragrans</i> strain 54Pin                         | NR_025280.1                    |
