# Supplementary material
Source: MDPI journal article supplement (https://www.mdpi.com/2076-3417/12/21/11093)
Supplement: s1 [file s1]

**Table S2.** *Proteus* spp. strains included in phylogenetic analysis of 16S rRNA gene sequences retrieved from NCBI database.

| Species and strain                            | Accession no. of<br>16S rRNA gene |
|-----------------------------------------------|-----------------------------------|
| Proteobacteria phylum                         |                                   |
| Gammaaproteobacteria class                    |                                   |
| Morganellaceae family, <i>Proteus</i> genus   |                                   |
| <i>Proteus alimenterum</i> strain FITM-28     | MN625854.1                        |
| <i>Proteus alimenterum</i> strain TY6         | MK332344.1                        |
| <i>Proteus hauseri</i> strain NBRC 105696     | AB682269.1                        |
| <i>Proteus hauseri</i> strain CEMTC_691       | MZ396548.1                        |
| <i>Proteus mirabilis</i> strain Prom22        | MZ067160.1                        |
| <i>Proteus mirabilis</i> strain R18           | OL629226.1                        |
| <i>Proteus myxofaciens</i> strain NBRC 105711 | AB682280.1                        |
| <i>Proteus myxofaciens</i> strain GTC 1265    | AB273746.1                        |
| <i>Proteus myxofaciens</i> strain VITVJ1      | OM250031.1                        |
| <i>Proteus penneri</i> strain ALK616          | KC456586.1                        |
| <i>Proteus penneri</i> strain ALK629          | KC456594.1                        |
| <i>Proteus penneri</i> strain N501            | MK629815.1                        |
| <i>Proteus terrae</i> strain N5/687           | MN749807.1                        |
| <i>Proteus terrae</i> strain N5/687           | OK083578.1                        |
| Other Morganellaceae genera                   |                                   |
| <i>Morganella morganii</i> strain JX2021      | OL989214.1                        |
