# Supplementary material
Source: MDPI journal article supplement (https://www.mdpi.com/2076-3417/12/21/11093)

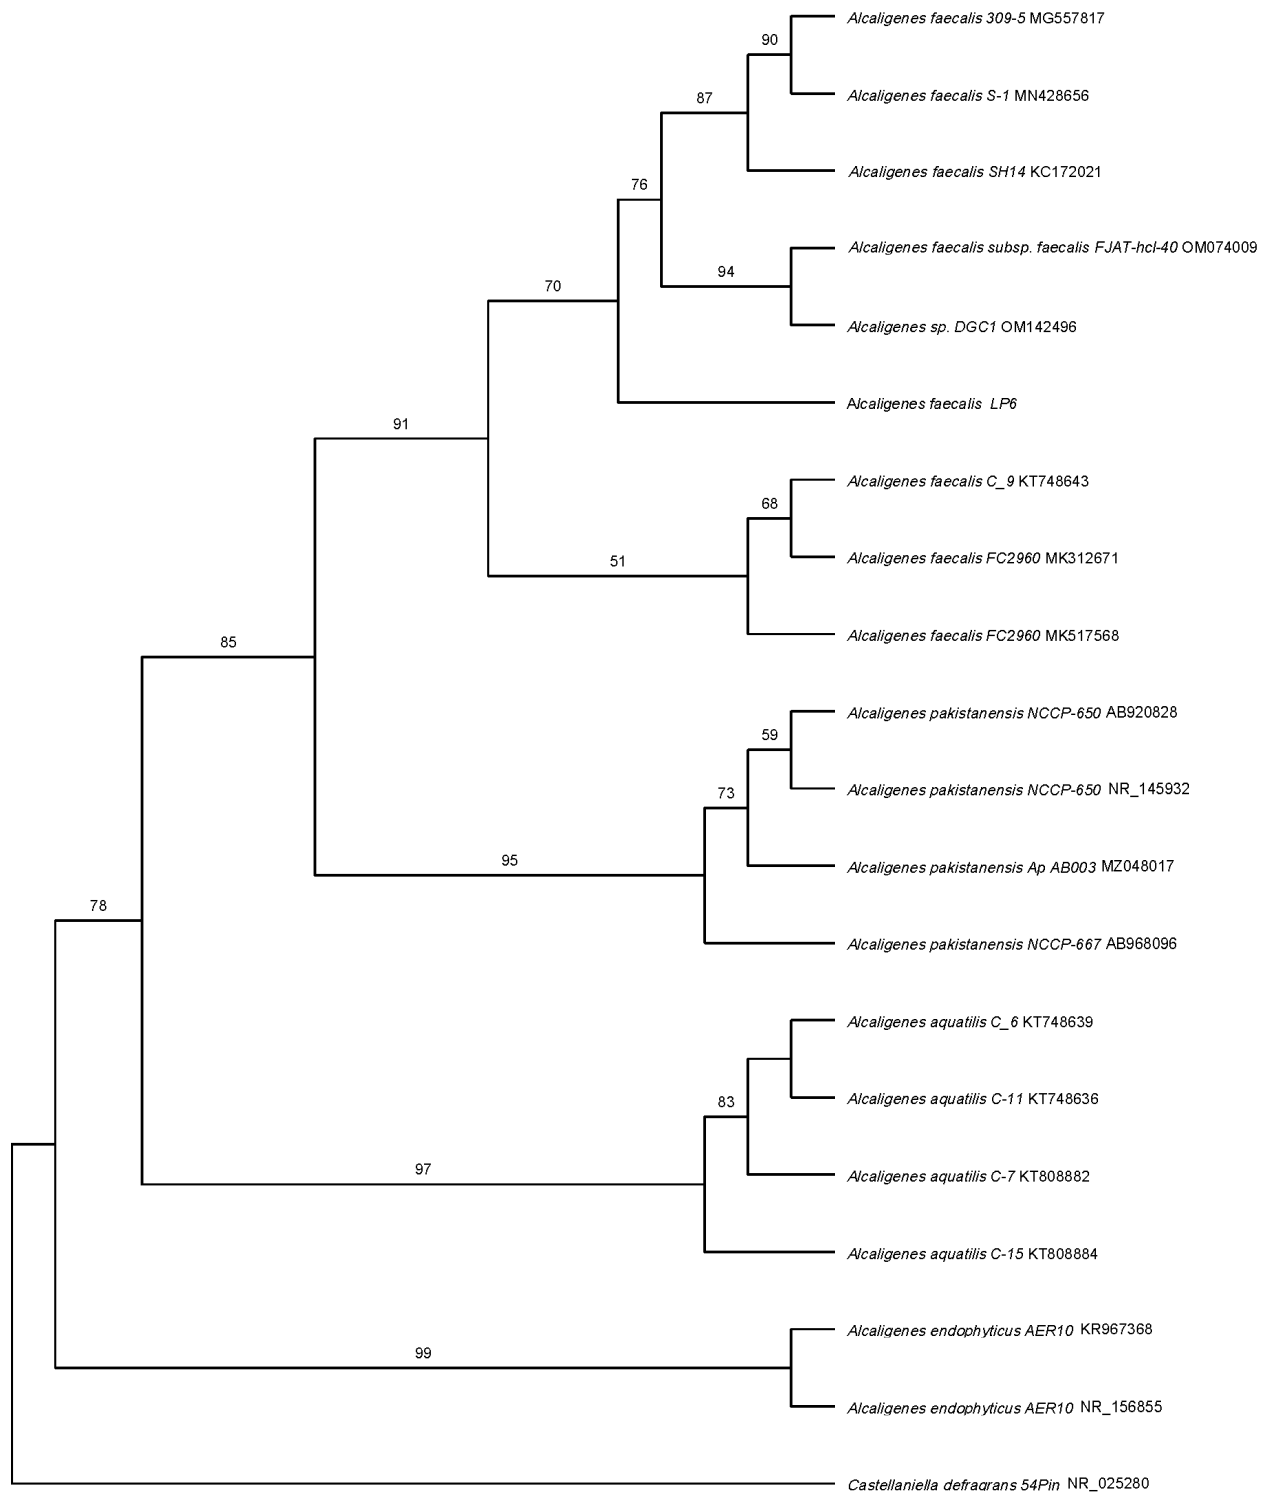

0.005

Supplement: s1 [file s1]

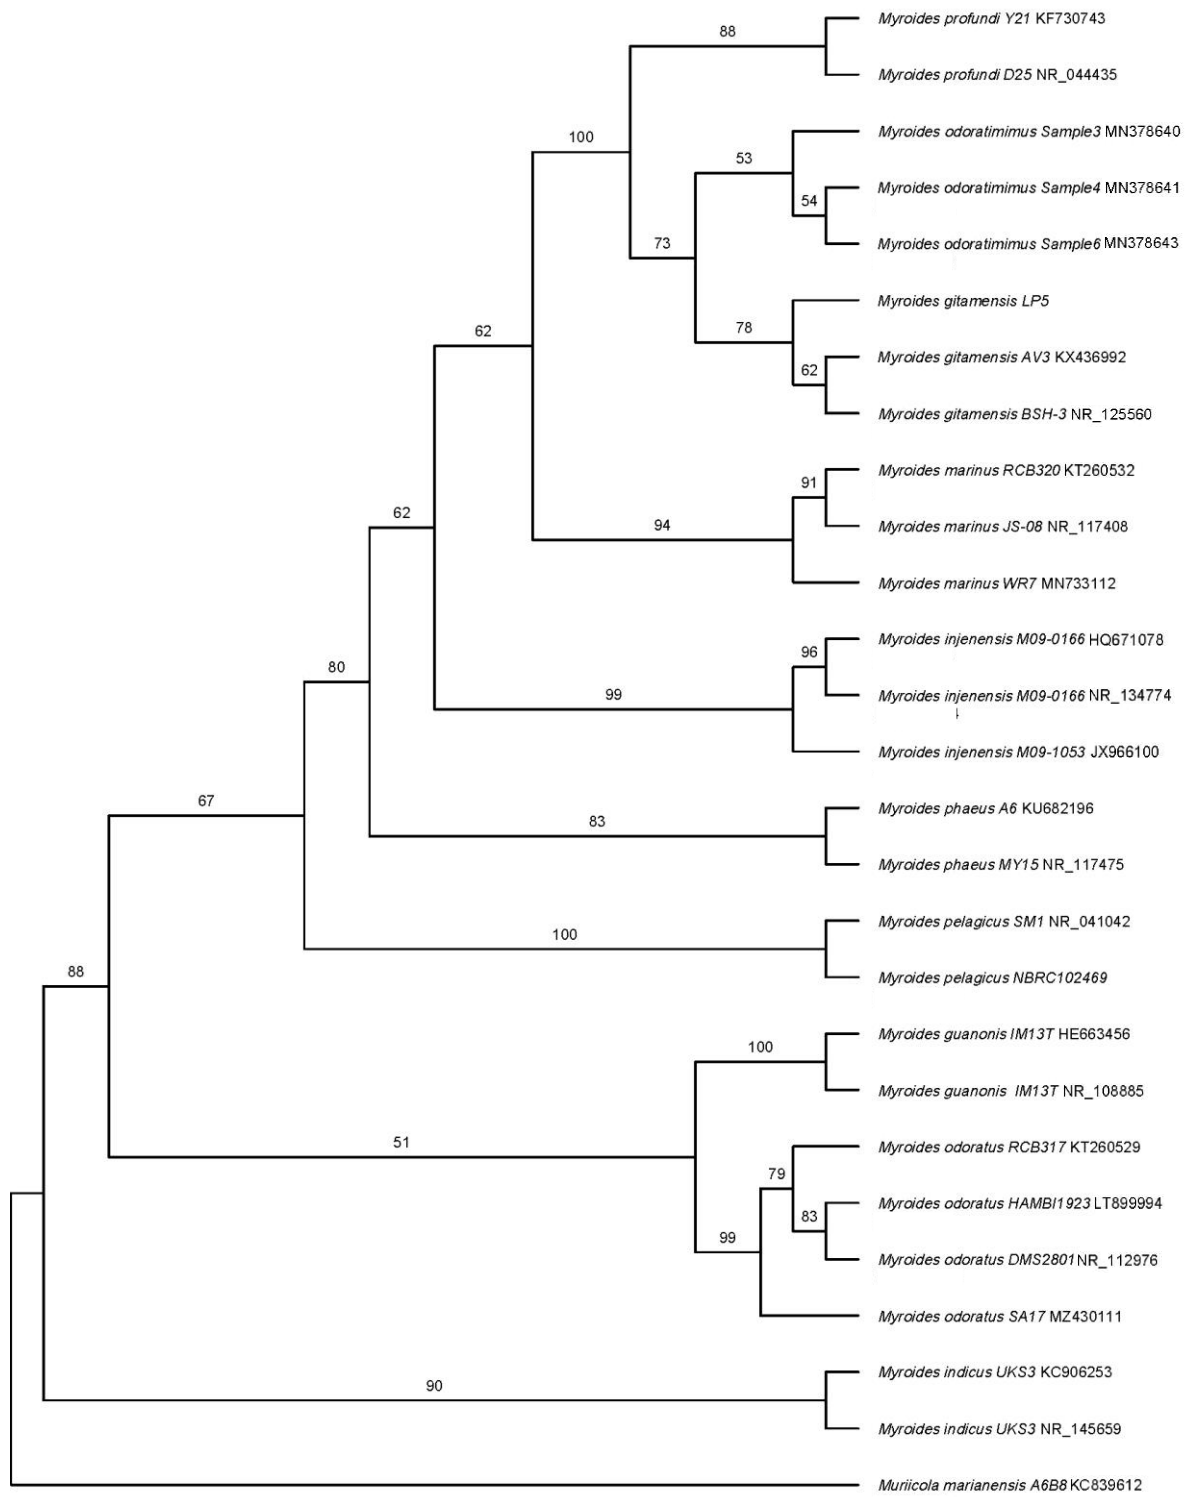

0.04

Supplement: s1 [file s1]

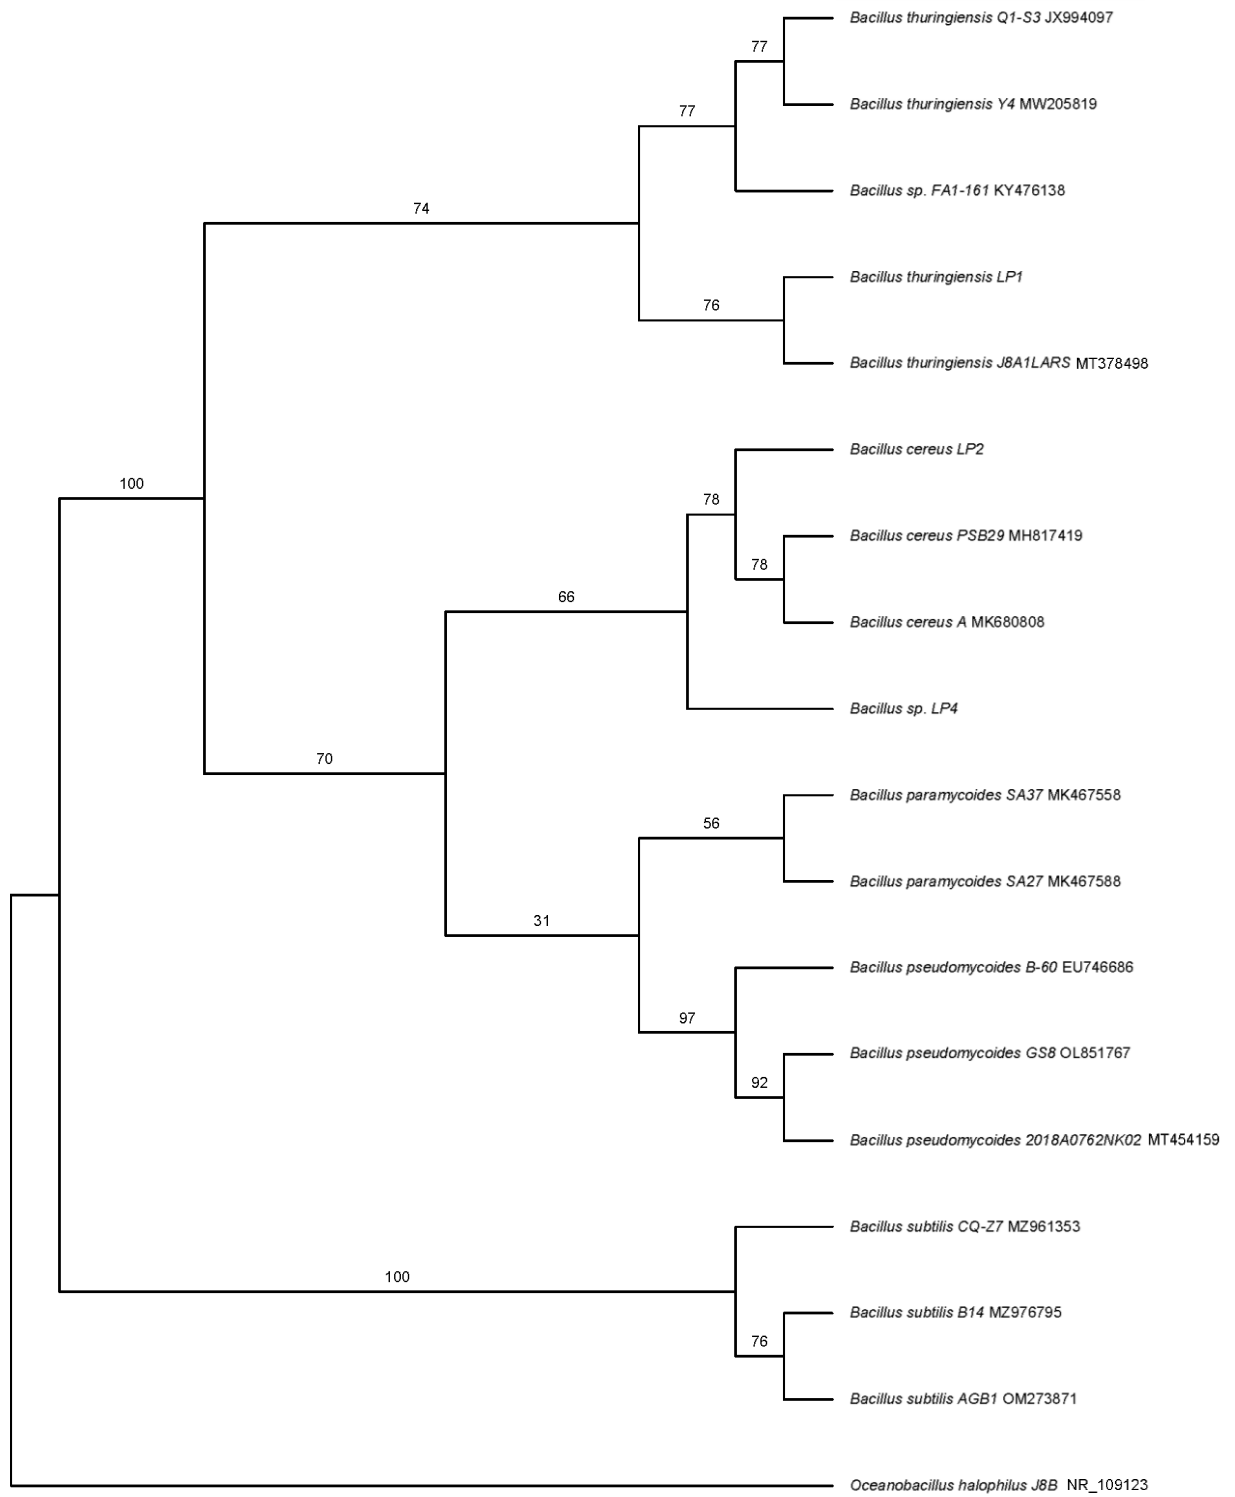

0.009

Supplement: s1 [file s1]

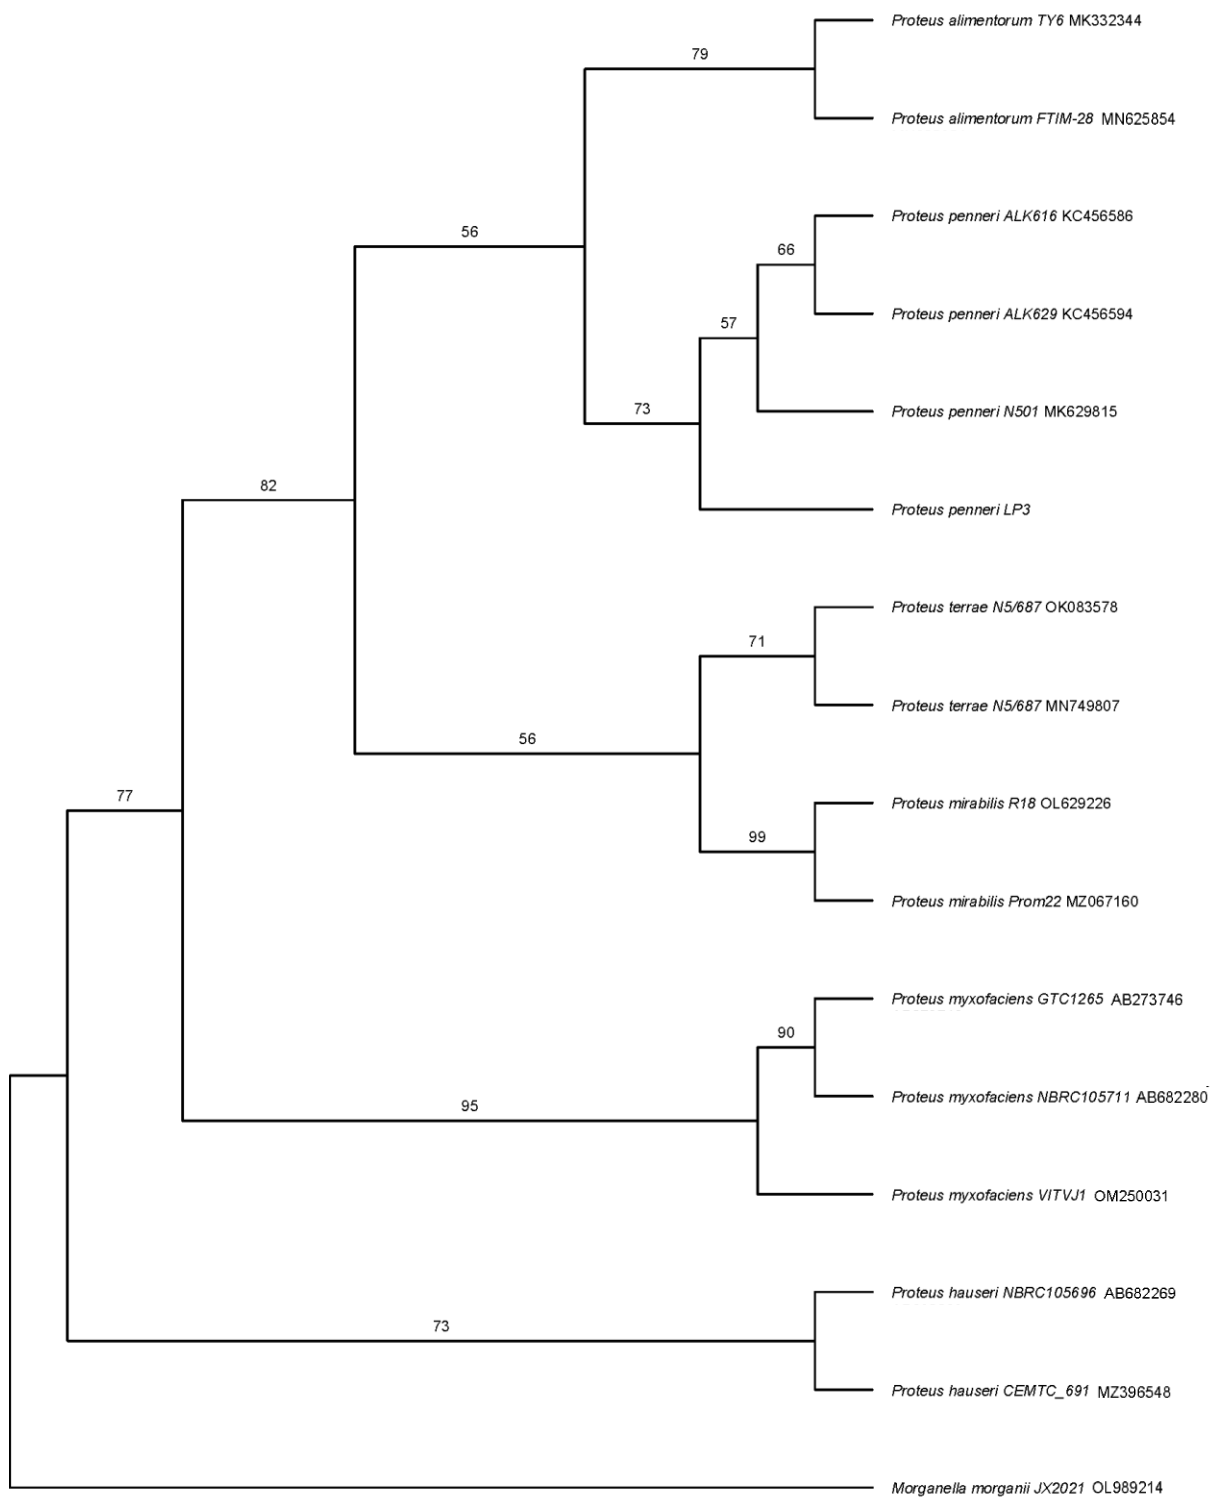

0.009

Supplement: s1 [file s1]
